# Supplementary material for: Rituximab therapy for intractable pemphigus: A multicenter, open‐label, single‐arm, prospective study of 20 Japanese patients
Source: PubMed Central journal article supplement (PMC10091989; doi:10.1111/1346-8138.16597), 2022-10-04
Supplement: JDE-50-175-s001.pdf [file JDE-50-175-s001.pdf]

|                                                  | remission rate % | P-value* |
|--------------------------------------------------|------------------|----------|
| Overall response                                 | 75.0 (15/20)     | -        |
| CR                                               | 55.0 (11/20)     |          |
| PR                                               | 20.0 (4/20)      |          |
| Factors                                          |                  |          |
| Type of pemphigus                                |                  |          |
| PV                                               | 72.7 (8/11)      |          |
| PF                                               | 75.0 (6/8)       | 1.000    |
| Age at treatment (median 48 years old)           |                  |          |
| < 48                                             | 75 (6/8)         |          |
| ≥ 48                                             | 75 (9/12)        | 1.000    |
| Body weight at treatment (median 62.45 kg)       |                  |          |
| < 62.45 kg                                       | 80.0 (8/10)      |          |
| ≥ 62.45 kg                                       | 70.0 (7/10)      | 1.000    |
| Disease duration (median 860 days)               |                  |          |
| < 860 days                                       | 70.0 (7/10)      |          |
| ≥ 860 days                                       | 80.0 (8/10)      | 1.000    |
| PSL dose at baseline (median 17.75 mg/day)       |                  |          |
| < 17.75 mg/day                                   | 70.0 (7/10)      |          |
| ≥ 17.75 mg/day                                   | 80.0 (8/10)      | 1.000    |
| PDAI score at baseline                           |                  |          |
| ≤ 8 (mild)                                       | 87.5 (7/8)       |          |
| ≥ 9 (moderate to severe)                         | 66.7 (8/12)      | 0.603    |
| anti-Dsg1 antibody at baseline (median 276 U/mL) |                  |          |
| < 276 U/mL                                       | 88.9 (8/9)       |          |
| ≥ 276 U/mL                                       | 66.7 (6/9)       | 0.576    |
| anti-Dsg3 antibody at baseline (median 499 U/mL) |                  |          |
| < 499 U/mL                                       | 80.0 (4/5)       |          |
| ≥ 499 U/mL                                       | 60.0 (3/5)       | 1.000    |
| Concomitant immunosuppressants                   |                  |          |
| Yes                                              | 73.3 (11/15)     |          |
| No                                               | 80.0 (4/5)       | 1.000    |

\* Fisher's exact test
