# Supplementary material for: Rituximab therapy for intractable pemphigus: A multicenter, open‐label, single‐arm, prospective study of 20 Japanese patients
Source: PubMed Central journal article supplement (PMC10091989; doi:10.1111/1346-8138.16597), 2022-10-04
Supplement: JDE-50-175-s002.pdf [file JDE-50-175-s002.pdf]

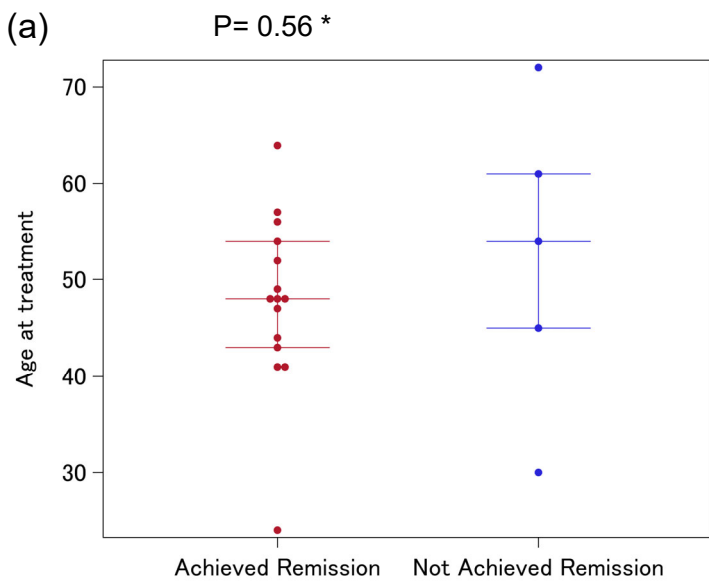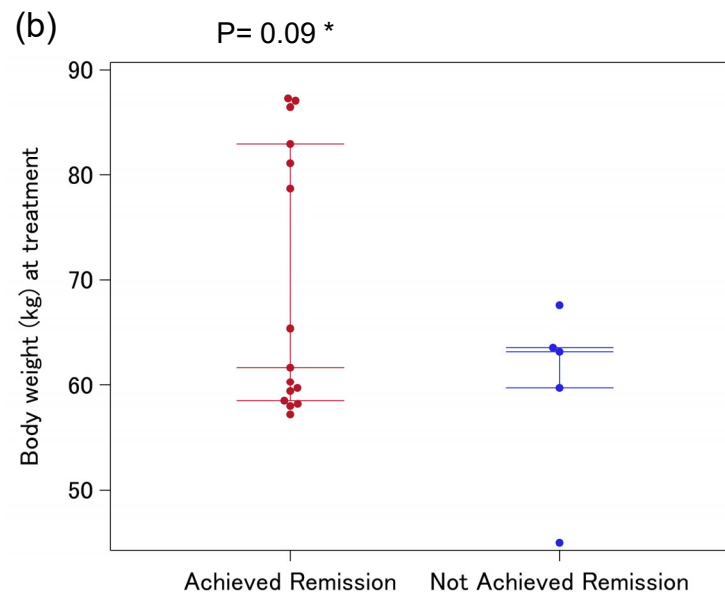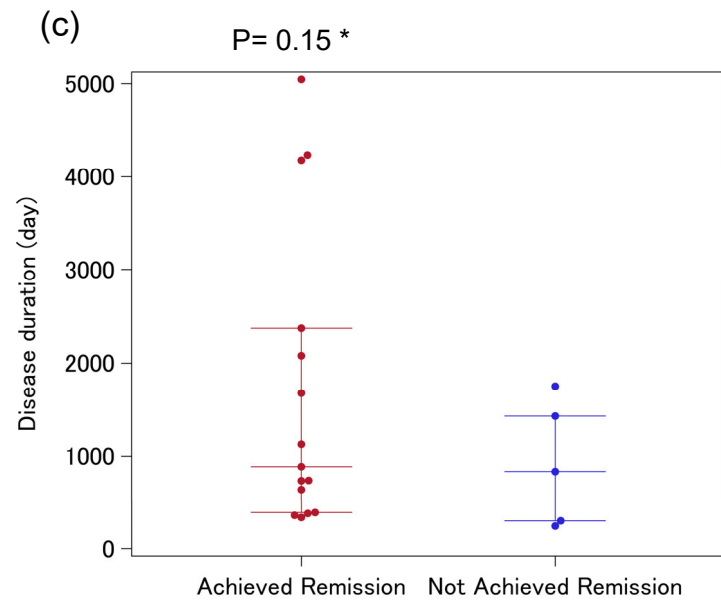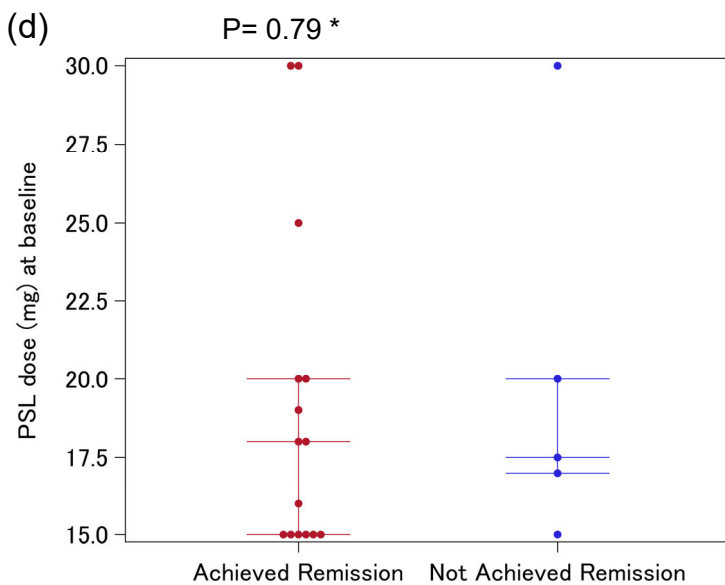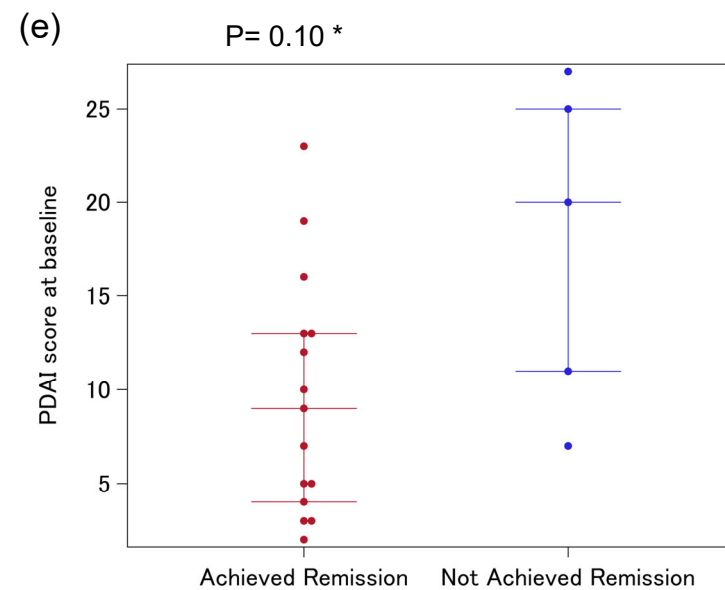

\*Welch's T-test

Supplementary Figure 1
